# Supplementary material for: Solution-processed ZnO/Si based heterostructures with enhanced photocatalytic performance
Source: Royal Society of Chemistry journal article supplement (doi:10.1039/c8nj03015d), 2018-01-01
Supplement: c8nj03015d1.pdf [file c8nj03015d1.pdf]

## Electronic Supplementary Information

### Solution-processed ZnO/Si based heterostructures with enhanced photocatalytic performances

Chien-Hsin Tang,<sup>a</sup> Kai-Yu Chen,<sup>a</sup> and Chia-Yun Chen<sup>\*a,b</sup>

<sup>a</sup> Department of Materials Science and Engineering, National Cheng Kung University, Tainan 70101, Taiwan

<sup>b</sup> Hierarchical Green-Energy Materials (Hi-GEM) Research Center, National Cheng Kung University, Tainan 70101, Taiwan

#### S1 Morphological investigations of ZnO nanoparticles formed with and without pressure-induced deposition via baking treatment

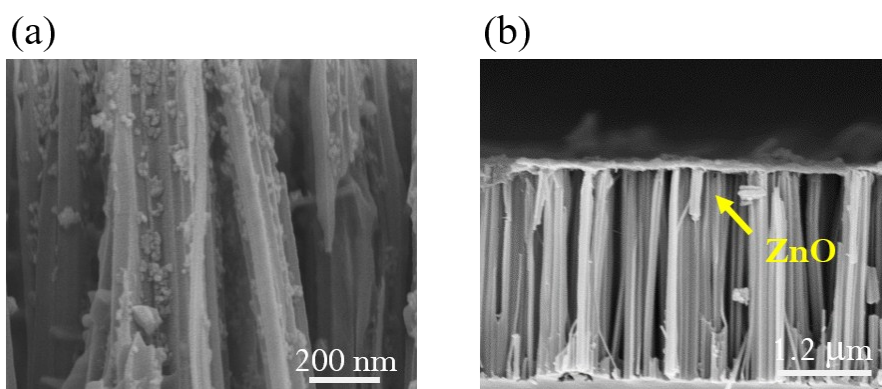

**Figure S1** (a) High-magnification SEM image and (b) Cross-sectional SEM image of ZnO nanoparticles formed on Si nanowire arrays with and without pressure-induced deposition via baking treatment. ZnO aggregated particles could be clearly observed on the top of Si nanowire arrays due to the intended aggregations of ZnO seeds, as shown in Fig. S1(b).
